# Supplementary material
Source: MDPI journal article supplement (https://www.mdpi.com/1424-8247/15/5/510)
Supplement: s1 [file s1]

## **Supplementary Materials:**

# **A Quantitative LC-MS/MS Method for the Detection of 26 Synthetic Cathinones and Metabolites and Its Application to Suspicious Clinical and Forensic URINE samples**

**Abdulaziz A. Aldubayyan <sup>1,2</sup>, Erika Castrignano <sup>1</sup>, Simon Elliott <sup>1,3</sup> and Vincenzo Abbate <sup>1,\*</sup>**

<sup>1</sup> Department of Analytical, Environmental & Forensic Sciences, Faculty of Life Sciences & Medicine, King's College London, London SE1 9NH, UK; [abdulaziz.aldubayyan@kcl.ac.uk](mailto:abdulaziz.aldubayyan@kcl.ac.uk) or [aaldubayyan@pscc.med.sa](mailto:aaldubayyan@pscc.med.sa) (A.A.A.); [erika.castrignano@kcl.ac.uk](mailto:erika.castrignano@kcl.ac.uk) (E.C.); [simon.elliott@kcl.ac.uk](mailto:simon.elliott@kcl.ac.uk) (S.E.)

<sup>2</sup> Department of Toxicology, Central Military Laboratory and Blood Bank, Prince Sultan Military Medical City, Riyadh 12233, Saudi Arabia

<sup>3</sup> Elliott Forensic Consulting, Birmingham B16 9HN, UK

\* Correspondence: [vincenzo.abbate@kcl.ac.uk](mailto:vincenzo.abbate@kcl.ac.uk)

| Content of Tables                                                                                                                                                                                | Page |
|--------------------------------------------------------------------------------------------------------------------------------------------------------------------------------------------------|------|
| <b>Table S1.</b> Calibration parameters, limit of detection, and limit of quantification for all analytes in urine samples. ....                                                                 | 4    |
| <b>Table S2.</b> Bias and precision for urine at QC-low (30 ng/mL), QC-medium (400 ng/mL) and QC-high (800 ng/mL) concentrations. ....                                                           | 5    |
| <b>Table S3.</b> Group A and B of controls comprising of common drugs (n=196) at a concentration of 10 or 100 ng/mL (depending on the drug). ....                                                | 12   |
| <b>Table S4.</b> Processed sample stability of SCt in urine after 24, 48 and 72 h of storage on autosampler (10°C) at QC-low (30 ng/mL) and QC-high (800 ng/mL). ....                            | 16   |
| <b>Table S5.</b> Calculated ion ratio tolerance between less intense peak area to that of more intense and that was established by the spiked QC samples for metabolites positive findings. .... | 18   |
| <b>Table S6.</b> Maximum permitted tolerance for ion ratio .....                                                                                                                                 | 18   |

| Content of Figures                                                                                                                                                          | Page |
|-----------------------------------------------------------------------------------------------------------------------------------------------------------------------------|------|
| <b>Figure S1.</b> Matrix effects of SCt and metabolites in urine at 30 and 800 ng/mL. The error bars show RSD (n = 5). .....                                                | 20   |
| <b>Figure S2.</b> Confirmatory results for an authentic urine sample (No. 19) testing positive for dihydro-mephedrone (left); and a QC sample (400 ng/mL; right) .....      | 21   |
| <b>Figure S3.</b> Confirmatory results for an authentic urine sample (No. 34) testing positive for dihydro-N-ethylpentylone (left); and a QC sample (400 ng/mL; right)..... | 22   |
| <b>Figure S4.</b> Confirmatory results for an authentic urine sample (No. 49) testing positive for dihydro-mephedrone (left); and a QC sample (400 ng/mL; right) .....      | 23   |
| <b>Figure S5.</b> Representative MRM chromatograms of ethylone (A) and butylone (B).....                                                                                    | 24   |
| <b>Figure S6.</b> Reduction of mephedrone to dihydro-mephedrone .....                                                                                                       | 25   |

**Table S1.** Calibration parameters, limit of detection, and limit of quantification for all analytes in urine samples.

| Analyte                     | LOD<br>(ng/mL) | LOQ<br>(ng/mL) | Intercept $\pm$ SD<br>(n=5) | Intercept $\pm$ SD<br>(n=5) | Slope<br>$\pm$ SD (n=5) | R <sup>2</sup><br>$\pm$ SD (n=5) |
|-----------------------------|----------------|----------------|-----------------------------|-----------------------------|-------------------------|----------------------------------|
| Mephedrone                  | 0.22           | 1              | 1–1000                      | 0.0023 $\pm$ 0.0079         | 0.1173 $\pm$ 0.0119     | 0.9974 $\pm$ 0.0009              |
| Methylone                   | 0.11           | 1              | 1–1000                      | -0.0105 $\pm$ 0.0037        | 0.1154 $\pm$ 0.0168     | 0.9978 $\pm$ 0.0021              |
| Methedrone                  | 0.37           | 1              | 1–1000                      | 0.0013 $\pm$ 0.0075         | 0.0662 $\pm$ 0.0039     | 0.9975 $\pm$ 0.0026              |
| Ethylone                    | 0.23           | 1              | 1–1000                      | -0.0005 $\pm$ 0.0084        | 0.1206 $\pm$ 0.0094     | 0.9983 $\pm$ 0.0019              |
| Butylone                    | 0.29           | 1              | 1–1000                      | 0.0032 $\pm$ 0.0028         | 0.0309 $\pm$ 0.0013     | 0.9979 $\pm$ 0.0015              |
| Dibutylone                  | 0.23           | 1              | 1–1000                      | 0.0024 $\pm$ 0.0120         | 0.1714 $\pm$ 0.0256     | 0.9977 $\pm$ 0.0015              |
| 4-CEC                       | 0.09           | 1              | 1–1000                      | -0.0042 $\pm$ 0.0017        | 0.0662 $\pm$ 0.0038     | 0.9984 $\pm$ 0.0013              |
| 4-Cl- $\alpha$ -PPP         | 0.30           | 1              | 1–1000                      | 0.0079 $\pm$ 0.0193         | 0.2147 $\pm$ 0.0172     | 0.9979 $\pm$ 0.0014              |
| N-ethylpentylone            | 0.26           | 1              | 1–1000                      | 0.0104 $\pm$ 0.0083         | 0.1045 $\pm$ 0.0039     | 0.9984 $\pm$ 0.0007              |
| 4-EMC                       | 0.11           | 1              | 1–1000                      | 0.0068 $\pm$ 0.0035         | 0.1021 $\pm$ 0.0064     | 0.9984 $\pm$ 0.0016              |
| $\alpha$ -PVP               | 0.13           | 1              | 1–1000                      | -0.0219 $\pm$ 0.0090        | 0.2255 $\pm$ 0.0157     | 0.9988 $\pm$ 0.0008              |
| MDPV                        | 0.35           | 1              | 1–1000                      | -0.0033 $\pm$ 0.0159        | 0.1511 $\pm$ 0.0147     | 0.9987 $\pm$ 0.0009              |
| 4-MPD                       | 0.22           | 1              | 1–1000                      | -0.0252 $\pm$ 0.0255        | 0.3841 $\pm$ 0.0395     | 0.9960 $\pm$ 0.0039              |
| N-ethylhexedrone            | 0.25           | 1              | 1–1000                      | -0.0040 $\pm$ 0.0141        | 0.1901 $\pm$ 0.0140     | 0.9993 $\pm$ 0.0003              |
| 4-F-PHP                     | 0.19           | 1              | 1–1000                      | -0.0246 $\pm$ 0.0167        | 0.2849 $\pm$ 0.0234     | 0.9972 $\pm$ 0.0027              |
| 4-Cl- $\alpha$ -PVP         | 0.30           | 1              | 1–1000                      | 0.0050 $\pm$ 0.0162         | 0.1761 $\pm$ 0.0139     | 0.9990 $\pm$ 0.0006              |
| Dihydro-mephedrone          | 0.39           | 1              | 1–1000                      | 0.0174 $\pm$ 0.0168         | 0.1426 $\pm$ 0.0212     | 0.9983 $\pm$ 0.0012              |
| Dihydro-MDPV                | 0.43           | 1              | 1–1000                      | 0.0224 $\pm$ 0.0104         | 0.0797 $\pm$ 0.0059     | 0.9985 $\pm$ 0.0015              |
| Dihydro-4-Cl- $\alpha$ -PPP | 0.49           | 1              | 1–1000                      | 0.0292 $\pm$ 0.0183         | 0.1223 $\pm$ 0.0137     | 0.9965 $\pm$ 0.0030              |
| Dihydro-4-EMC               | 0.23           | 1              | 1–1000                      | 0.0218 $\pm$ 0.0114         | 0.1609 $\pm$ 0.0195     | 0.9984 $\pm$ 0.0009              |
| Dihydro-N-ethylhexedrone    | 0.32           | 1              | 1–1000                      | 0.0296 $\pm$ 0.0239         | 0.2455 $\pm$ 0.0189     | 0.9981 $\pm$ 0.0014              |
| Dihydro-dibutylone          | 0.20           | 1              | 1–1000                      | 0.0696 $\pm$ 0.0700         | 1.1340 $\pm$ 0.1303     | 0.9989 $\pm$ 0.0010              |
| Dihydro-N-ethylpentylone    | 0.36           | 1              | 1–1000                      | 0.0305 $\pm$ 0.0176         | 0.1610 $\pm$ 0.0121     | 0.9989 $\pm$ 0.0013              |
| Dihydro-4-MPD               | 0.25           | 1              | 1–1000                      | 0.1267 $\pm$ 0.0559         | 0.7330 $\pm$ 0.0820     | 0.9982 $\pm$ 0.0011              |
| Dihydro-4-CEC               | 0.24           | 1              | 1–1000                      | 0.0125 $\pm$ 0.0058         | 0.0802 $\pm$ 0.0076     | 0.9983 $\pm$ 0.0013              |
| Dihydro-4-F-PHP             | 0.30           | 1              | 1–1000                      | -0.0081 $\pm$ 0.0436        | 0.4782 $\pm$ 0.0213     | 0.9988 $\pm$ 0.0011              |

**Table S2.** Bias and precision for urine at QC-low (30 ng/mL), QC-medium (400 ng/mL) and QC-high (800 ng/mL) concentrations.

| Analyte    | Nominal concentration (ng/mL) |          | Run 1 (n=3) | Run 2 (n=3) | Run 3 (n=3) | Run 4 (n=3) | Run 5 (n=3) | Grand ave. (n=15) | Bias (%) (n=15) | CV (%) within run (n=15) | CV (%) between run (n=15) |
|------------|-------------------------------|----------|-------------|-------------|-------------|-------------|-------------|-------------------|-----------------|--------------------------|---------------------------|
| Mephedrone | 30                            | CV (%)   | 5.6         | 4.4         | 6.8         | 2.9         | 4.7         | 25.7              | -14.4           | 7.7                      | 7.8                       |
|            |                               | Bias (%) | -2.7        | -19.3       | -12.5       | -17.2       | -16.2       |                   |                 |                          |                           |
|            | 400                           | CV (%)   | 3.6         | 8.8         | 4.9         | 2.5         | 6.2         | 429.5             | 7.4             | 6.9                      | 7.0                       |
|            |                               | Bias (%) | -1.9        | 8.5         | 10.9        | 3.6         | 12.8        |                   |                 |                          |                           |
|            | 800                           | CV (%)   | 2.5         | 0.8         | 7.2         | 1.2         | 4.3         | 823.4             | 2.9             | 7.4                      | 7.6                       |
|            |                               | Bias (%) | 3.1         | -3.4        | 6.5         | -4.1        | 12.5        |                   |                 |                          |                           |
| Methylone  | 30                            | CV (%)   | 0.1         | 0.7         | 2.3         | 0.9         | 2.0         | 25.4              | -15.5           | 4.7                      | 4.9                       |
|            |                               | Bias (%) | -16.6       | -19.9       | -18.3       | -10.4       | -12.6       |                   |                 |                          |                           |
|            | 400                           | CV (%)   | 3.4         | 0.6         | 1.9         | 2.2         | 2.9         | 414.4             | 3.6             | 5.5                      | 5.7                       |
|            |                               | Bias (%) | -1.4        | -1.8        | 8.0         | 0.6         | 10.8        |                   |                 |                          |                           |
|            | 800                           | CV (%)   | 4.1         | 1.0         | 1.6         | 2.1         | 3.5         | 840.7             | 5.1             | 7.0                      | 7.2                       |
|            |                               | Bias (%) | -1.3        | 2.9         | 0.0         | 4.3         | 17.3        |                   |                 |                          |                           |
| Methedrone | 30                            | CV (%)   | 11.0        | 8.3         | 8.7         | 1.9         | 4.0         | 27.3              | -9.0            | 9.6                      | 9.7                       |
|            |                               | Bias (%) | 0.1         | -13.4       | -0.8        | -15.5       | -12.3       |                   |                 |                          |                           |
|            | 400                           | CV (%)   | 3.6         | 3.2         | 5.0         | 2.2         | 7.0         | 386.4             | -3.4            | 7.9                      | 8.1                       |
|            |                               | Bias (%) | -14.9       | 1.4         | -1.9        | -8.8        | 3.3         |                   |                 |                          |                           |

|          |     |          |       |       |       |       |       |       |       |      |      |
|----------|-----|----------|-------|-------|-------|-------|-------|-------|-------|------|------|
| Ethylone | 800 | CV (%)   | 2.0   | 2.0   | 2.5   | 2.4   | 4.4   | 787.0 | -1.6  | 3.5  | 3.5  |
|          |     | Bias (%) | -1.0  | -2.5  | -4.6  | -3.0  | 2.1   |       |       |      |      |
|          | 30  | CV (%)   | 0.9   | 3.7   | 5.3   | 5.7   | 5.5   | 26.3  | -12.2 | 8.7  | 9.0  |
|          |     | Bias (%) | 0.8   | -14.2 | -7.8  | -19.2 | -16.3 |       |       |      |      |
|          | 400 | CV (%)   | 6.6   | 3.6   | 3.3   | 2.7   | 2.1   | 411.8 | 0.26  | 6.2  | 6.4  |
|          |     | Bias (%) | -9.7  | 6.7   | 7.1   | 1.9   | 4.5   |       |       |      |      |
|          | 800 | CV (%)   | 4.5   | 0.4   | 1.9   | 0.6   | 2.7   | 800.1 | 0.0   | 2.9  | 3.0  |
|          |     | Bias (%) | -1.8  | -1.6  | -2.1  | 2.6   | 2.4   |       |       |      |      |
|          | 30  | CV (%)   | 9.3   | 8.4   | 9.2   | 4.9   | 1.7   | 27.4  | -8.7  | 11.0 | 11.3 |
|          |     | Bias (%) | 4.2   | -12.5 | -13.5 | -17.8 | 0.5   |       |       |      |      |
|          | 400 | CV (%)   | 0.2   | 3.2   | 4.7   | 5.8   | 1.4   | 391.4 | -2.2  | 9.3  | 9.6  |
|          |     | Bias (%) | -18.6 | 6.9   | -0.7  | -6.8  | 2.9   |       |       |      |      |
| Butylone | 800 | CV (%)   | 2.9   | 4.6   | 0.7   | 5.2   | 2.9   | 770.1 | -3.7  | 5.7  | 5.8  |
|          |     | Bias (%) | -8.0  | 0.7   | -9.2  | -5.1  | 1.5   |       |       |      |      |
|          | 30  | CV (%)   | 7.1   | 2.2   | 3.8   | 7.1   | 2.3   | 27.3  | -9.1  | 9.9  | 10.2 |
|          |     | Bias (%) | 7.8   | -5.1  | -16.8 | -12.5 | -13.0 |       |       |      |      |
|          | 400 | CV (%)   | 1.8   | 13.9  | 7.7   | 4.0   | 3.1   | 433.6 | 8.4   | 8.6  | 8.6  |
|          |     | Bias (%) | 8.0   | 12.0  | 0.9   | 4.5   | 16.5  |       |       |      |      |
|          | 800 | CV (%)   | 4.6   | 11.0  | 10.1  | 7.6   | 2.3   | 816.7 | 2.1   | 7.8  | 7.8  |
|          |     | Bias (%) | -1.7  | -0.5  | -0.6  | 9.1   | 2.8   |       |       |      |      |
|          | 30  | CV (%)   | 8.4   | 1.6   | 3.7   | 2.2   | 1.0   | 25.0  | -16.6 | 4.3  | 4.4  |
|          |     | Bias (%) | -14.6 | -17.2 | -18.6 | -12.6 | -19.2 |       |       |      |      |
| 4-CEC    | 30  | CV (%)   | 8.4   | 1.6   | 3.7   | 2.2   | 1.0   | 25.0  | -16.6 | 4.3  | 4.4  |
|          |     | Bias (%) | -14.6 | -17.2 | -18.6 | -12.6 | -19.2 |       |       |      |      |

|                     |     |          |       |       |      |       |       |       |      |      |      |
|---------------------|-----|----------|-------|-------|------|-------|-------|-------|------|------|------|
| 4-Cl- $\alpha$ -PPP | 400 | CV (%)   | 1.8   | 5.1   | 1.3  | 3.3   | 5.3   | 419.3 | 4.8  | 7.0  | 7.2  |
|                     |     | Bias (%) | -8.6  | 3.1   | 8.3  | 5.3   | 11.6  |       |      |      |      |
|                     | 800 | CV (%)   | 2.4   | 2.9   | 1.1  | 5.3   | 0.6   | 803.5 | 0.4  | 4.0  | 4.0  |
|                     |     | Bias (%) | -0.8  | -3.2  | -1.7 | 4.0   | 3.4   |       |      |      |      |
|                     | 30  | CV (%)   | 5.1   | 9.2   | 8.5  | 3.6   | 2.1   | 28.3  | -5.8 | 12.2 | 12.5 |
|                     |     | Bias (%) | 9.3   | -8.8  | 4.7  | -10.7 | -18.3 |       |      |      |      |
|                     | 400 | CV (%)   | 3.4   | 1.5   | 1.8  | 3.5   | 2.2   | 420.1 | 7.5  | 7.5  | 7.8  |
|                     |     | Bias (%) | -12.3 | 5.2   | 10.4 | 8.1   | 7.8   |       |      |      |      |
|                     | 800 | CV (%)   | 4.0   | 1.4   | 1.0  | 0.5   | 2.1   | 815.4 | 1.9  | 4.9  | 5.1  |
|                     |     | Bias (%) | 6.2   | -5.5  | 0.5  | 2.7   | 7.1   |       |      |      |      |
| N-ethylpentylone    | 30  | CV (%)   | 0.6   | 6.0   | 3.1  | 2.0   | 8.8   | 28.2  | -6.2 | 11.5 | 11.8 |
|                     |     | Bias (%) | 11.6  | -12.6 | 2.7  | -12.1 | -14.5 |       |      |      |      |
|                     | 400 | CV (%)   | 6.8   | 5.7   | 2.2  | 3.3   | 3.3   | 423.2 | 5.8  | 5.3  | 5.4  |
|                     |     | Bias (%) | 1.5   | 0.3   | 11.1 | 6.3   | 8.4   |       |      |      |      |
|                     | 800 | CV (%)   | 2.2   | 3.7   | 1.9  | 3.8   | 1.5   | 779.4 | -2.6 | 3.7  | 3.7  |
|                     |     | Bias (%) | -4.0  | -6.1  | -3.9 | -0.3  | 0.9   |       |      |      |      |
| 4-EMC               | 30  | CV (%)   | 5.8   | 5.0   | 2.8  | 3.3   | 7.5   | 27.4  | -8.5 | 10.5 | 10.8 |
|                     |     | Bias (%) | -3.5  | -7.1  | 3.9  | -19.7 | -14.6 |       |      |      |      |
|                     | 400 | CV (%)   | 3.5   | 5.2   | 2.9  | 4.7   | 4.6   | 402.4 | 0.6  | 6.6  | 6.7  |
|                     |     | Bias (%) | -12.3 | 2.2   | 3.7  | 2.6   | 2.6   |       |      |      |      |
|                     | 800 | CV (%)   | 2.2   | 3.1   | 0.9  | 5.6   | 2.0   | 811.5 | 1.4  | 3.2  | 3.2  |
|                     |     | Bias (%) | 3.3   | 1.7   | -1.4 | 1.8   | 2.5   |       |      |      |      |

|                  |     |          |       |       |       |       |       |       |       |      |      |
|------------------|-----|----------|-------|-------|-------|-------|-------|-------|-------|------|------|
| $\alpha$ -PVP    | 30  | CV (%)   | 1.2   | 0.5   | 5.9   | 1.6   | 0.7   | 24.9  | -16.9 | 4.5  | 4.6  |
|                  |     | Bias (%) | -9.7  | -19.5 | -17.5 | -18.2 | -16.9 |       |       |      |      |
|                  | 400 | CV (%)   | 8.3   | 6.0   | 3.4   | 6.2   | 2.0   | 401.0 | 0.3   | 6.0  | 6.1  |
|                  |     | Bias (%) | -7.5  | -2.6  | 4.9   | 0.9   | 3.0   |       |       |      |      |
|                  | 800 | CV (%)   | 1.7   | 3.8   | 0.8   | 2.7   | 4.9   | 812.3 | 1.5   | 4.4  | 4.5  |
|                  |     | Bias (%) | 0.9   | -3.6  | 0.2   | 4.2   | 5.8   |       |       |      |      |
| 4-MPD            | 30  | CV (%)   | 3.0   | 1.9   | 3.1   | 5.5   | 4.3   | 27.9  | -7.0  | 12.9 | 13.4 |
|                  |     | Bias (%) | 9.8   | 5.2   | -7.8  | -17.9 | -18.6 |       |       |      |      |
|                  | 400 | CV (%)   | 2.0   | 6.3   | 0.4   | 3.2   | 1.7   | 406.7 | 1.7   | 5.8  | 5.9  |
|                  |     | Bias (%) | -5.7  | -2.8  | 4.5   | 1.1   | 8.7   |       |       |      |      |
|                  | 800 | CV (%)   | 8.5   | 0.6   | 1.4   | 1.9   | 2.4   | 809.5 | 1.2   | 4.9  | 4.9  |
|                  |     | Bias (%) | 9.3   | -0.7  | 0.1   | -2.3  | 2.7   |       |       |      |      |
| N-ethylhexedrone | 30  | CV (%)   | 0.6   | 2.0   | 2.0   | 3.3   | 0.2   | 26.8  | -10.7 | 8.0  | 8.3  |
|                  |     | Bias (%) | -1.4  | -5.3  | -7.4  | -18.8 | -17.5 |       |       |      |      |
|                  | 400 | CV (%)   | 2.8   | 4.5   | 1.0   | 1.6   | 0.8   | 409.4 | 2.4   | 3.1  | 3.1  |
|                  |     | Bias (%) | -0.9  | 0.2   | 2.3   | 5.6   | 3.6   |       |       |      |      |
|                  | 800 | CV (%)   | 1.6   | 0.9   | 1.9   | 1.3   | 4.1   | 824.1 | 3.0   | 4.6  | 4.7  |
|                  |     | Bias (%) | 8.3   | -3.1  | 0.7   | 3.7   | 7.2   |       |       |      |      |
| 4-F-PHP          | 30  | CV (%)   | 4.6   | 0.9   | 2.9   | 0.5   | 5.0   | 25.8  | -14.2 | 4.5  | 4.6  |
|                  |     | Bias (%) | -8.3  | -17.0 | -13.8 | -16.9 | -13.0 |       |       |      |      |
|                  | 400 | CV (%)   | 1.8   | 5.0   | 2.2   | 3.3   | 5.0   | 388.8 | -2.8  | 6.9  | 7.1  |
|                  |     | Bias (%) | -10.1 | -1.7  | 2.1   | -10.0 | 3.2   |       |       |      |      |



|                             |     |          |       |       |       |       |       |       |       |      |      |
|-----------------------------|-----|----------|-------|-------|-------|-------|-------|-------|-------|------|------|
| 4-Cl- $\alpha$ -PVP         | 800 | CV (%)   | 2.4   | 2.2   | 3.7   | 3.5   | 1.8   | 788.9 | -1.4  | 6.0  | 6.2  |
|                             |     | Bias (%) | -1.4  | -3.6  | 2.8   | -9.6  | 4.8   |       |       |      |      |
|                             | 30  | CV (%)   | 6.0   | 8.4   | 2.3   | 0.9   | 1.6   | 25.1  | -16.2 | 9.0  | 9.3  |
|                             |     | Bias (%) | -0.3  | -18.2 | -17.6 | -19.7 | -19.9 |       |       |      |      |
| 4-Cl- $\alpha$ -PVP         | 400 | CV (%)   | 4.4   | 2.2   | 1.2   | 2.3   | 0.4   | 397.6 | -0.6  | 6.6  | 6.8  |
|                             |     | Bias (%) | -11.5 | 0.1   | -1.7  | -2.3  | 8.8   |       |       |      |      |
|                             | 800 | CV (%)   | 0.1   | 2.0   | 1.0   | 0.7   | 2.0   | 785.8 | -1.8  | 4.3  | 4.4  |
|                             |     | Bias (%) | -1.4  | -1.4  | -5.9  | -4.8  | 4.8   |       |       |      |      |
| Dihydro-mephedrone          | 30  | CV (%)   | 0.9   | 8.8   | 5.9   | 5.4   | 7.8   | 31.5  | 5.1   | 9.2  | 9.4  |
|                             |     | Bias (%) | 16.0  | -0.1  | 13.3  | -4.2  | 4.5   |       |       |      |      |
|                             | 400 | CV (%)   | 6.1   | 7.3   | 3.2   | 0.8   | 0.4   | 428.6 | 7.1   | 5.8  | 5.9  |
|                             |     | Bias (%) | 7.1   | 13.5  | 10.3  | 1.6   | 3.2   |       |       |      |      |
| Dihydro-MDPV                | 800 | CV (%)   | 3.1   | 4.5   | 2.9   | 0.9   | 2.2   | 767.0 | -4.1  | 3.1  | 3.1  |
|                             |     | Bias (%) | -4.6  | -7.0  | -2.5  | -4.4  | -2.3  |       |       |      |      |
|                             | 30  | CV (%)   | 3.6   | 8.6   | 12.3  | 4.9   | 8.0   | 30.5  | 1.7   | 10.5 | 10.6 |
|                             |     | Bias (%) | 17.2  | 6.7   | -0.6  | -5.3  | -4.4  |       |       |      |      |
| Dihydro-MDPV                | 400 | CV (%)   | 6.9   | 4.4   | 6.7   | 2.2   | 1.5   | 410.7 | 2.7   | 5.1  | 5.1  |
|                             |     | Bias (%) | -1.5  | 8.5   | 8.5   | 2.7   | 1.0   |       |       |      |      |
|                             | 800 | CV (%)   | 0.6   | 1.7   | 5.4   | 1.8   | 3.3   | 752.1 | -6.0  | 5.0  | 5.1  |
|                             |     | Bias (%) | -6.5  | -9.9  | -5.2  | -8.9  | 0.4   |       |       |      |      |
| Dihydro-4-Cl- $\alpha$ -PPP | 30  | CV (%)   | 10.3  | 7.5   | 10.5  | 8.4   | 3.7   | 28.1  | -6.4  | 8.5  | 8.5  |
|                             |     | Bias (%) | 1.3   | -5.7  | -3.1  | -11.2 | -10.7 |       |       |      |      |
|                             | 400 | CV (%)   | 0.5   | 5.8   | 5.3   | 3.6   | 1.2   | 429.9 | 7.5   | 5.1  | 5.2  |
|                             |     | Bias (%) | -0.4  | 7.6   | 10.1  | 5.7   | 11.8  |       |       |      |      |

|                          |     |          |      |      |       |      |      |       |      |     |      |
|--------------------------|-----|----------|------|------|-------|------|------|-------|------|-----|------|
|                          |     |          |      |      |       |      |      |       |      |     |      |
|                          |     | CV (%)   | 5.5  | 5.0  | 6.7   | 7.6  | 8.7  |       |      |     |      |
|                          | 800 | Bias (%) | -8.4 | -2.7 | -10.5 | -1.6 | 2.8  | 769.9 | -3.8 | 7.8 | 7.9  |
|                          |     |          |      |      |       |      |      |       |      |     |      |
| Dihydro-4-EMC            | 30  | CV (%)   | 3.2  | 9.3  | 4.0   | 7.9  | 9.3  |       |      |     |      |
|                          |     | Bias (%) | 18.0 | 3.8  | 12.2  | -6.0 | 2.4  | 31.6  | 5.2  | 9.9 | 10.1 |
|                          | 400 | CV (%)   | 3.1  | 1.7  | 2.1   | 3.8  | 1.7  |       |      |     |      |
|                          |     | Bias (%) | -6.0 | 7.8  | 14.1  | 10.8 | 15.7 | 438.1 | 9.5  | 6.9 | 7.1  |
|                          | 800 | CV (%)   | 6.9  | 0.3  | 2.0   | 2.6  | 0.7  |       |      |     |      |
|                          |     | Bias (%) | -3.3 | -3.9 | -2.0  | 1.6  | 4.6  | 796.8 | -0.4 | 4.1 | 4.2  |
|                          | 30  | CV (%)   | 2.0  | 3.6  | 2.6   | 0.6  | 3.8  |       |      |     |      |
|                          |     | Bias (%) | 5.0  | 1.4  | -2.3  | -1.3 | -8.6 | 29.5  | -1.6 | 5.1 | 5.3  |
| Dihydro-N-ethylhexedrone | 400 | CV (%)   | 1.4  | 3.7  | 1.4   | 1.2  | 2.1  |       |      |     |      |
|                          |     | Bias (%) | -1.8 | 7.8  | 10.6  | 11.5 | 12.3 | 435.2 | 8.8  | 4.7 | 4.9  |
|                          | 800 | CV (%)   | 3.5  | 1.9  | 2.6   | 4.1  | 4.0  |       |      |     |      |
|                          |     | Bias (%) | -1.4 | -7.0 | 2.9   | 3.0  | 3.1  | 801.9 | 0.2  | 5.1 | 5.2  |
|                          | 30  | CV (%)   | 3.3  | 3.9  | 7.7   | 8.9  | 4.6  |       |      |     |      |
|                          |     | Bias (%) | -2.1 | -6.2 | 9.1   | -5.3 | -4.9 | 29.4  | -1.9 | 8.2 | 8.3  |
|                          | 400 | CV (%)   | 3.6  | 2.2  | 1.0   | 2.0  | 1.6  |       |      |     |      |
|                          |     | Bias (%) | -8.5 | 12.7 | 13.7  | 11.0 | 0.3  | 427.4 | 6.8  | 7.9 | 8.2  |
| Dihydro-dibutylone       | 800 | CV (%)   | 1.0  | 1.2  | 0.2   | 1.0  | 1.7  |       |      |     |      |
|                          |     | Bias (%) | 1.3  | -4.1 | -1.7  | 2.7  | 2.3  | 800.1 | 0.0  | 2.9 | 3.0  |
|                          | 30  | CV (%)   | 8.7  | 7.8  | 2.5   | 7.9  | 2.2  |       |      |     |      |
|                          |     | Bias (%) | 7.4  | -9.3 | 2.0   | -2.1 | -8.9 | 29.1  | -2.9 | 8.3 | 8.4  |
|                          | 400 | CV (%)   | 3.6  | 2.2  | 1.0   | 2.0  | 1.6  |       |      |     |      |
|                          |     | Bias (%) | -8.5 | 12.7 | 13.7  | 11.0 | 0.3  | 427.4 | 6.8  | 7.9 | 8.2  |
|                          | 800 | CV (%)   | 1.0  | 1.2  | 0.2   | 1.0  | 1.7  |       |      |     |      |
|                          |     | Bias (%) | 1.3  | -4.1 | -1.7  | 2.7  | 2.3  | 800.1 | 0.0  | 2.9 | 3.0  |
| Dihydro-N-ethylpentylone | 30  | CV (%)   | 8.7  | 7.8  | 2.5   | 7.9  | 2.2  |       |      |     |      |
|                          |     | Bias (%) | 7.4  | -9.3 | 2.0   | -2.1 | -8.9 | 29.1  | -2.9 | 8.3 | 8.4  |

|                 |               |          |          |       |       |       |       |       |      |      |      |
|-----------------|---------------|----------|----------|-------|-------|-------|-------|-------|------|------|------|
|                 | 400           | CV (%)   | 4.6      | 0.4   | 3.2   | 7.0   | 2.9   | 430.5 | 7.6  | 6.7  | 6.9  |
|                 |               | Bias (%) | -4.9     | 5.3   | 7.7   | 12.8  | 13.0  |       |      |      |      |
|                 | 800           | CV (%)   | 0.3      | 1.5   | 4.6   | 2.6   | 2.3   | 794.3 | -0.7 | 6.7  | 7.0  |
|                 |               | Bias (%) | -11.9    | -0.8  | -4.2  | 7.5   | 2.1   |       |      |      |      |
|                 | Dihydro-4-MPD | 30       | CV (%)   | 2.8   | 4.5   | 6.0   | 5.0   | 31.5  | 5.2  | 7.0  | 7.1  |
|                 |               |          | Bias (%) | 18.3  | 3.0   | 3.6   | -1.4  |       |      |      |      |
|                 |               | 400      | CV (%)   | 1.4   | 8.1   | 1.6   | 7.2   | 414.2 | 3.5  | 9.9  | 10.1 |
|                 |               |          | Bias (%) | -9.4  | -1.7  | 3.5   | 5.3   |       |      |      |      |
|                 |               | 800      | CV (%)   | 0.1   | 1.4   | 3.6   | 3.9   | 801.1 | 0.1  | 6.1  | 6.3  |
|                 |               |          | Bias (%) | -1.4  | -8.3  | 2.8   | 0.7   |       |      |      |      |
|                 | 30            | CV (%)   | 6.8      | 6.8   | 9.4   | 3.0   | 5.2   | 31.0  | 3.2  | 8.3  | 8.4  |
|                 |               | Bias (%) | 15.3     | 0.3   | 7.6   | -3.0  | 0.0   |       |      |      |      |
|                 | 400           | CV (%)   | 1.7      | 2.1   | 3.5   | 1.7   | 4.0   | 432.8 | 8.2  | 7.1  | 7.3  |
|                 |               | Bias (%) | 6.0      | 12.9  | 13.0  | 12.7  | -4.4  |       |      |      |      |
|                 | 800           | CV (%)   | 0.0      | 1.3   | 1.3   | 2.0   | 1.5   | 795.6 | -0.5 | 2.2  | 2.2  |
|                 |               | Bias (%) | 1.8      | -2.3  | -2.2  | 1.4   | -0.7  |       |      |      |      |
| Dihydro-4-F-PHP | 30            | CV (%)   | 10.2     | 6.9   | 1.2   | 0.2   | 1.0   | 25.8  | 7.2  | 7.2  | 7.4  |
|                 |               | Bias (%) | -3.0     | -17.8 | -15.7 | -12.0 | -17.2 |       |      |      |      |
|                 | 400           | CV (%)   | 11.6     | 2.4   | 15.0  | 8.3   | 0.9   | 410.1 | 2.5  | 10.2 | 10.4 |
|                 |               | Bias (%) | -11.6    | 4.1   | -1.9  | 6.4   | 10.9  |       |      |      |      |
|                 | 800           | CV (%)   | 0.4      | 5.7   | 4.8   | 4.0   | 4.7   | 801.1 | 0.1  | 5.1  | 5.1  |
|                 |               | Bias (%) | 0.0      | -5.1  | 0.5   | 0.5   | 4.8   |       |      |      |      |

**Table S3.** Group A and B of controls comprising of common drugs (n=196) at a concentration of 10 or 100 ng/mL (depending on the drug).

| Analytes in Group A |                     |                |                   |
|---------------------|---------------------|----------------|-------------------|
| • Acebutolol        | • Tibolone          | • Cathine      | • Modafinil       |
| • Alprenolol        | • Zilpaterol        | • Ephedrine    | • Nikethamide     |
| • Atenolol          | • Bambuterol        | • Pholedrine   | • Norfenfluramine |
| • Betaxolol         | • Fenoterol         | • Cropropamine | • Pemoline        |
| • Bisoprolol        | • Formoterol        | • Crotethamide | • Cyclazodone     |
| • Bopindolol        | • Salbutamol        | • Etamivan     | • Famprofazone    |
| • Bunolol           | • Terbutaline       | • Etilefrine   | • Pentetrazol     |
| • Carteolol         | • Aminoglutethimide | • Fencamfamine | • Phendimetrazine |
| • Carvedilol        | • Anastrozole       | • Fencamine    | • Prolintane      |
| • Celiprolol        | • Testolactone      | • Fenetylline  | • Ritalinic acid  |
| • Esmolol           | • Tamoxifen         | • Fenfluramine | • Selegeline      |
| • Labetalol         | • Toremifene        | • Fenproporex  | • Sibutramine     |
| • Metipranolol      | • Amiloride         | • Heptaminol   | • Strychnine      |

|                        |                    |                       |                       |
|------------------------|--------------------|-----------------------|-----------------------|
| • Metoprolol           | • Bumetanide       | • Hydroxybromant.     | • Dimethylamphetamine |
| • Nadoxolol            | • Canrenone        | • Isometheptene       | • Mephentermine       |
| • Oxprenolol           | • Chlorexolone     | • Methylenedioxyamphe | • Dobutamine          |
| • Pindolol             | • Clopamide        | tamine                | • Buprenorphine       |
| • Propranolol          | • Indapamide       | • Ecstasy             | • Dextromoramide      |
| • Sotalol              | • Triamterene      | • Mefenorex           | • Fentanyl            |
| • Timolol              | • Amfepramone      | • Mesocrab            | • Hydromorphone       |
| • Stanazolol           | • Amiphenazole     | • Methamphetamine     | • Hydrocodone         |
| • Danazol              | • Amphetamine      | • Ortetamine          | • Morphine            |
| • Gestrinone           | • Benzoylecgonine  | • Phentermine         | • Codeine             |
| • Metribolone          | • Benzphetamine    | • Methoxyphenamine    | • Methadone           |
| • Tetrahydrogestrinone | • Benzylpiperazine | • Methylephedrine     | • Oxycodone           |
| • Clenbuterol          | • p-OH amphetamine | • Methylhexaneamine   | • Pentazocine         |
| <i>Continued</i>       |                    |                       |                       |

|                     |                           |                  |                       |
|---------------------|---------------------------|------------------|-----------------------|
| • Oxymorphone       | • Prednisone              | • FPCAM          | • Chlorthalidone      |
| • Pethidine         | • Methylprednisolone      | • Triamcinolone  | • Dichlorphenamide    |
| • Beclomethasone    | • Deflazacort             | • Bupropion      | • Etacrynic acid      |
| • Betamethasone     | • Desacetyl deflazacort   | • Tramadol       | • Furosemide          |
| • Budesonide        | • Desonide                | • Ketoconazole   | • Methylphenidate     |
| • OH-prednisolone   | • Fludrocortisone         | • Andarine       |                       |
| • 6b-OH budesonide  | • Flumethasone            | • Ostarine       |                       |
| • Clobetasol        | • Triamcinolone acetonide | • Acetazolamide  |                       |
| • Prednisolone      | • Fluticasone propionate  | • Chlorothiazide |                       |
| Analytes in Group B |                           |                  |                       |
| • Efaproxiral       | • Fenbutrazate            | • Pipradrol      | • Cyclothiazide       |
| • Acetylcarnitine   | • Phenpromethamine        | • Mitragynine    | • Epitizide           |
| • Diacetolol        | • Para-methylamphetamine  | • OH-mitragynine | • Polythiazide        |
| • Nadolol           | • Tuaminoheptane          | • Fluconazole    | • Trichloromethiazide |
| • OH-propranolol    | • Adrafinil frag          | • Miconazole     | • Altizide            |

|                |                         |                                               |                      |
|----------------|-------------------------|-----------------------------------------------|----------------------|
| • Exemestane   | • Propylhexedrine       | • Itraconazole                                | • Butizide           |
| • Sameterol    | • Etilamphetamine       | • <i>N,N</i> -Dimethyltryptamine              | • Methyclothiazide   |
| • Clomiphene   | • Ethylphenylbutylamine | • Selective Androgen<br>Receptor Modular- 4F  | • Xipamide           |
| • Fulvestrant  | • Prenylamine           | • Letrazole metab.                            | • Torasemide         |
| • Mefruside    | • Mephedrone            | • Selective Androgen<br>Receptor Modular 4-Cl | • Hydroflumethiazide |
| • Eplerenone   | • Trimetazidine         | • Probenecid                                  |                      |
| • Piretanide   | • 1,3-Dimethoxybenzene  | • Bendroflumethazide                          |                      |
| • Amphetaminil | • 2-am-6-me-heptane     | • Metolazone                                  |                      |
| • Benfluorex   | • 6-Monoacetylmorphine  | • Benzthiazide                                |                      |
| • Carphedon    | • Dexamethasone         | • Cyclopenthiazide                            |                      |
| • Clobezorex   | • Flunisolide           |                                               |                      |
| • Oxilofrine   | • Fluocortolone         |                                               |                      |

**Table S4.** Processed sample stability of SCt in urine after 24, 48 and 72 h of storage on autosampler (10°C) at QC low (30 ng/mL) and QC high (800 ng/mL). (n = 3).

| Analyte             | 24 h            |                 | 48 h            |                 | 72 h            |                 |
|---------------------|-----------------|-----------------|-----------------|-----------------|-----------------|-----------------|
|                     | QC low          | QC high         | QC low          | QC high         | QC low          | QC high         |
|                     | % loss<br>(RSD) |
| Mephedrone          | -1.1<br>(1.0)   | 1.0<br>(3.6)    | -2.9<br>(1.8)   | 0.4<br>(2.3)    | -2.0<br>(2.7)   | -1.1<br>(1.0)   |
| Methylone           | 9.2<br>(5.2)    | 0.0<br>(3.4)    | -8.3<br>(7.0)   | -5.1<br>(2.4)   | -8.1<br>(12.6)  | 9.2<br>(5.2)    |
| Methedrone          | -6.2<br>(18.3)  | -11.6<br>(2.2)  | -8.5<br>(15.6)  | -11.9<br>(4.9)  | -12.3<br>(14.6) | -6.2<br>(18.3)  |
| Ethylone            | -7.1<br>(6.2)   | 1.7<br>(2.4)    | -12.2<br>(6.6)  | -1.7<br>(4.0)   | -14.5<br>(6.8)  | -0.4<br>(4.5)   |
| Butylone            | 3.8<br>(2.6)    | -5.9<br>(8.8)   | -14.2<br>(17.0) | -13.0<br>(5.4)  | -12.7<br>(8.9)  | -11.7<br>(3.1)  |
| Dibutylone          | 5.7<br>(3.5)    | 0.2<br>(2.9)    | 4.1<br>(6.5)    | -0.3<br>(1.8)   | -6.5<br>(5.2)   | -1.3<br>(1.1)   |
| 4-CEC               | 0.3<br>(8.1)    | -8.5<br>(8.8)   | 5.1<br>(14.3)   | -2.5<br>(9.8)   | 2.0<br>(4.3)    | -3.5<br>(4.4)   |
| 4-Cl- $\alpha$ -PPP | -2.2<br>(6.6)   | -5.5<br>(3.1)   | 3.2<br>(8.4)    | -2.2<br>(1.2)   | 1.4<br>(8.9)    | -4.8<br>(2.2)   |
| N-ethylpentylone    | 0.1<br>(9.6)    | -9.2<br>(8.5)   | -8.5<br>(10.6)  | -4.3<br>(2.0)   | -2.1<br>(7.2)   | -11.4<br>(0.6)  |
| 4-EMC               | -9.4<br>(14.4)  | -6.8<br>(9.8)   | -6.6<br>(14.9)  | 2.1<br>(2.0)    | -7.0<br>(6.3)   | -1.2<br>(7.8)   |
| $\alpha$ -PVP       | -3.2<br>(4.8)   | -10.8<br>(3.3)  | 9.9<br>(14.3)   | -5.6<br>(1.5)   | 0.4<br>(3.1)    | -13.3<br>(2.1)  |



|                                   |                 |                 |                 |               |                 |                |
|-----------------------------------|-----------------|-----------------|-----------------|---------------|-----------------|----------------|
| MDPV                              | 3.6<br>(8.0)    | -8.8<br>(17.3)  | 5.6<br>(8.9)    | 0.3<br>(3.7)  | 1.7<br>(8.0)    | -1.2<br>(7.4)  |
| 4-MPD                             | 1.5<br>(6.9)    | -0.7<br>(5.3)   | -3.0<br>(13.9)  | -1.0<br>(2.8) | -0.5<br>(5.5)   | -10.5<br>(6.6) |
| <i>N</i> -ethylhexedrone          | -3.6<br>(13.1)  | -6.5<br>(2.7)   | -5.9<br>(12.2)  | 1.8<br>(1.0)  | -5.8<br>(6.1)   | -5.7<br>(2.1)  |
| 4-F-PHP                           | -7.7<br>(12.8)  | -9.0<br>(4.8)   | -6.5<br>(3.4)   | -2.4<br>(0.3) | -13.8<br>(3.9)  | -11.0<br>(0.6) |
| 4-Cl- $\alpha$ -PVP               | -10.1<br>(17.4) | -7.0<br>(14.4)  | -12.6<br>(12.0) | -4.8<br>(2.9) | -16.1<br>(7.4)  | -11.8<br>(3.0) |
| Dihydro-mephedrone                | -12.5<br>(11.5) | -5.4<br>(5.0)   | -17.3<br>(15.0) | -4.2<br>(5.0) | -15.1<br>(12.5) | -2.4<br>(1.9)  |
| Dihydro-MDPV                      | -13.0<br>(15.0) | -10.3<br>(8.3)  | -7.7<br>(11.9)  | 1.3<br>(5.3)  | -18.0<br>(6.3)  | -5.4<br>(8.5)  |
| Dihydro-4-Cl- $\alpha$ -PPP       | 8.8<br>(15.6)   | -3.4<br>(2.3)   | 10.8<br>(10.3)  | -4.0<br>(4.3) | 6.8<br>(14.8)   | -6.6<br>(3.1)  |
| Dihydro-4-EMC                     | -1.9<br>(3.3)   | -5.7<br>(2.7)   | -0.7<br>(17.6)  | 3.2<br>(1.7)  | -17.0<br>(6.3)  | -3.9<br>(2.3)  |
| Dihydro- <i>N</i> -ethylhexedrone | -3.9<br>(11.1)  | -3.8<br>(6.1)   | 2.0<br>(16.5)   | 6.6<br>(3.0)  | -1.6<br>(3.3)   | -2.1<br>(0.9)  |
| Dihydro-dibutylone                | -3.8<br>(11.8)  | -7.9<br>(6.8)   | 4.8<br>(13.9)   | -6.5<br>(2.0) | -8.6<br>(21.0)  | -8.0<br>(1.8)  |
| Dihydro- <i>N</i> -ethylpentylone | -3.0<br>(2.1)   | -9.1<br>(3.9)   | -5.4<br>(6.2)   | -5.6<br>(3.0) | -1.7<br>(5.9)   | -9.4<br>(2.5)  |
| Dihydro-4-MPD                     | 3.9<br>(13.8)   | -5.3<br>(10.9)  | 0.7<br>(15.1)   | -2.2<br>(2.9) | 1.6<br>(8.5)    | -7.9<br>(1.1)  |
| Dihydro-4-CEC                     | -3.2<br>(11.1)  | -4.7<br>(5.3)   | 5.5<br>(4.0)    | -1.8<br>(2.8) | -3.0<br>(6.1)   | -4.1<br>(2.0)  |
| Dihydro-4-F-PHP                   | -8.8<br>(6.3)   | -12.7<br>(13.0) | -3.3<br>(11.8)  | -9.2<br>(7.7) | -5.4<br>(12.5)  | -10.9<br>(1.9) |

**Table S5.** Calculated ion ratio tolerance between less intense peak area to that of more intense and that was established by the spiked QC samples for metabolites positive findings.

|                                                      | Ion ratio masses | Calculated ion ratio | Expected ion ratio | Ion ratio tolerance | Conforms |
|------------------------------------------------------|------------------|----------------------|--------------------|---------------------|----------|
| Dihydro-mephedrone<br>(Sample No. 19)                | 147/162          | 0.08                 | 0.11               | – 27.3%             | Yes      |
| Dihydro- <i>N</i> -ethylpentylone<br>(sample No. 34) | 191/234          | 0.19                 | 0.15               | 26.7%               | Yes      |
| Dihydro-mephedrone<br>(sample No. 49)                | 147/162          | 0.13                 | 0.11               | 18.2%               | Yes      |

**Table S6.** Maximum permitted tolerance for ion ratio.

| Ion ratio   | Permitted tolerance |
|-------------|---------------------|
| > 0.50      | ± 20%               |
| 0.20 – 0.50 | ± 25%               |

|             |       |
|-------------|-------|
| 0.10 – 0.20 | ± 30% |
| < 0.10      | ± 50% |

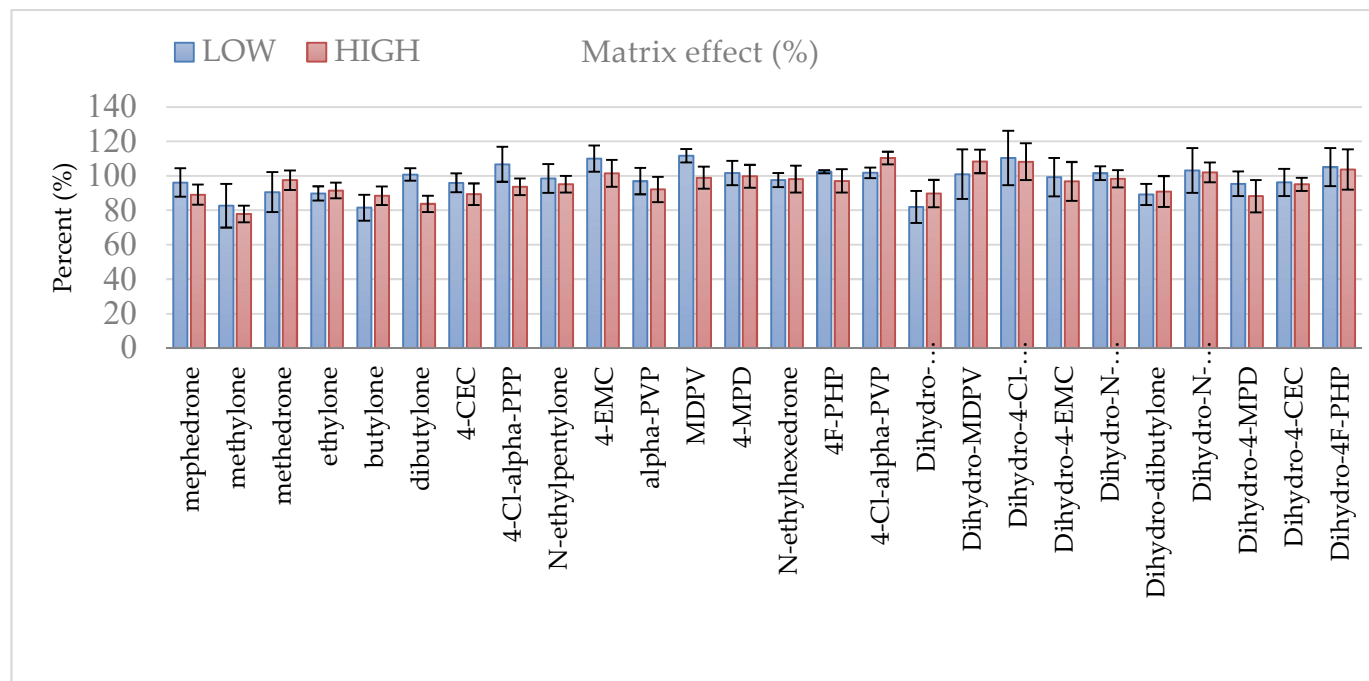

**Figure S1.** Matrix effects of Sct and metabolites in urine at 30 and 800 ng/mL. The error bars show RSD (n=5).

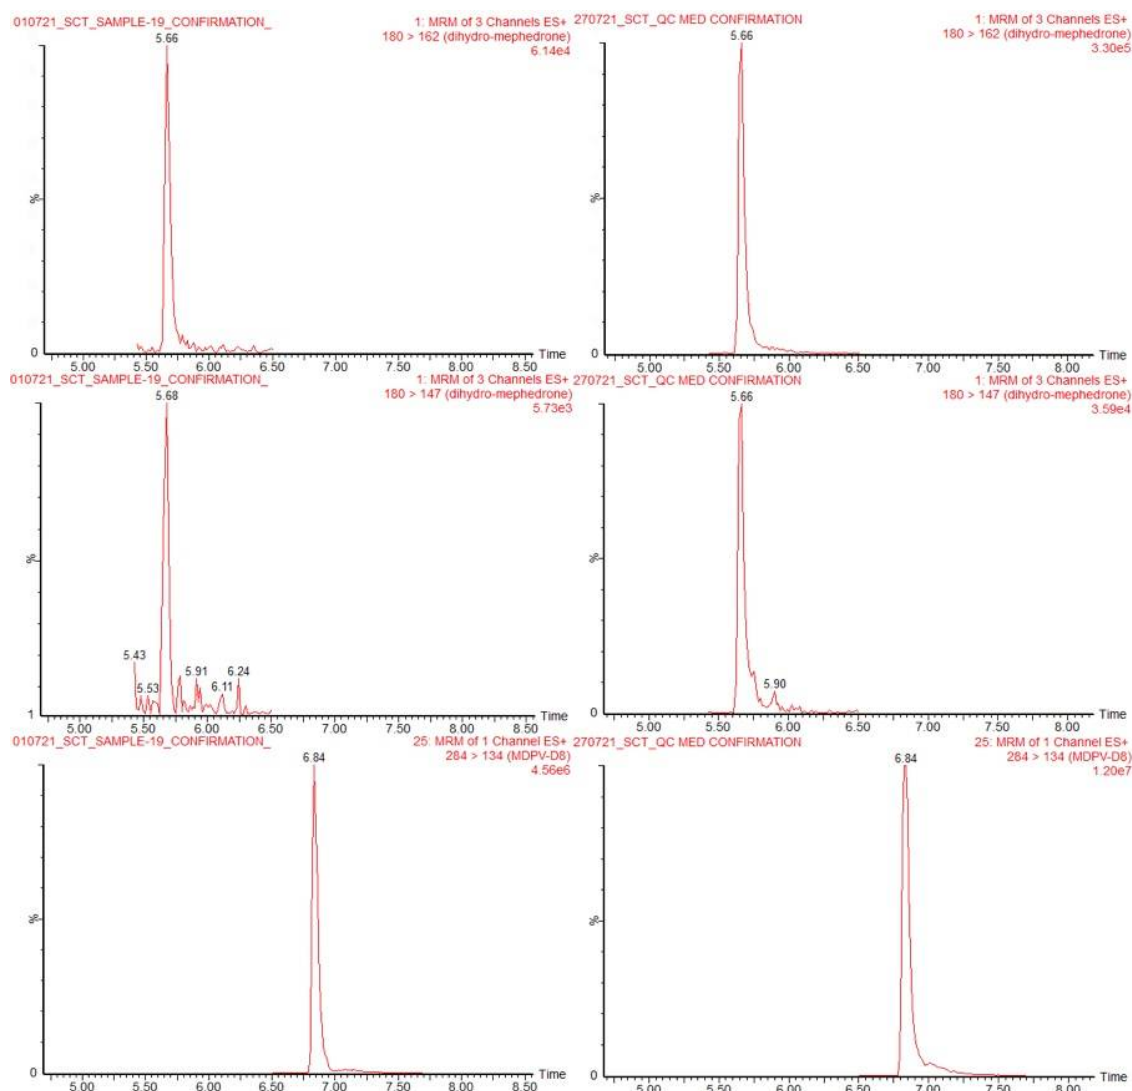

**Figure S2.** Confirmatory results for an authentic urine sample (No. 19) testing positive for dihydro-mephedrone (left); and a QC sample (400 ng/mL; right).

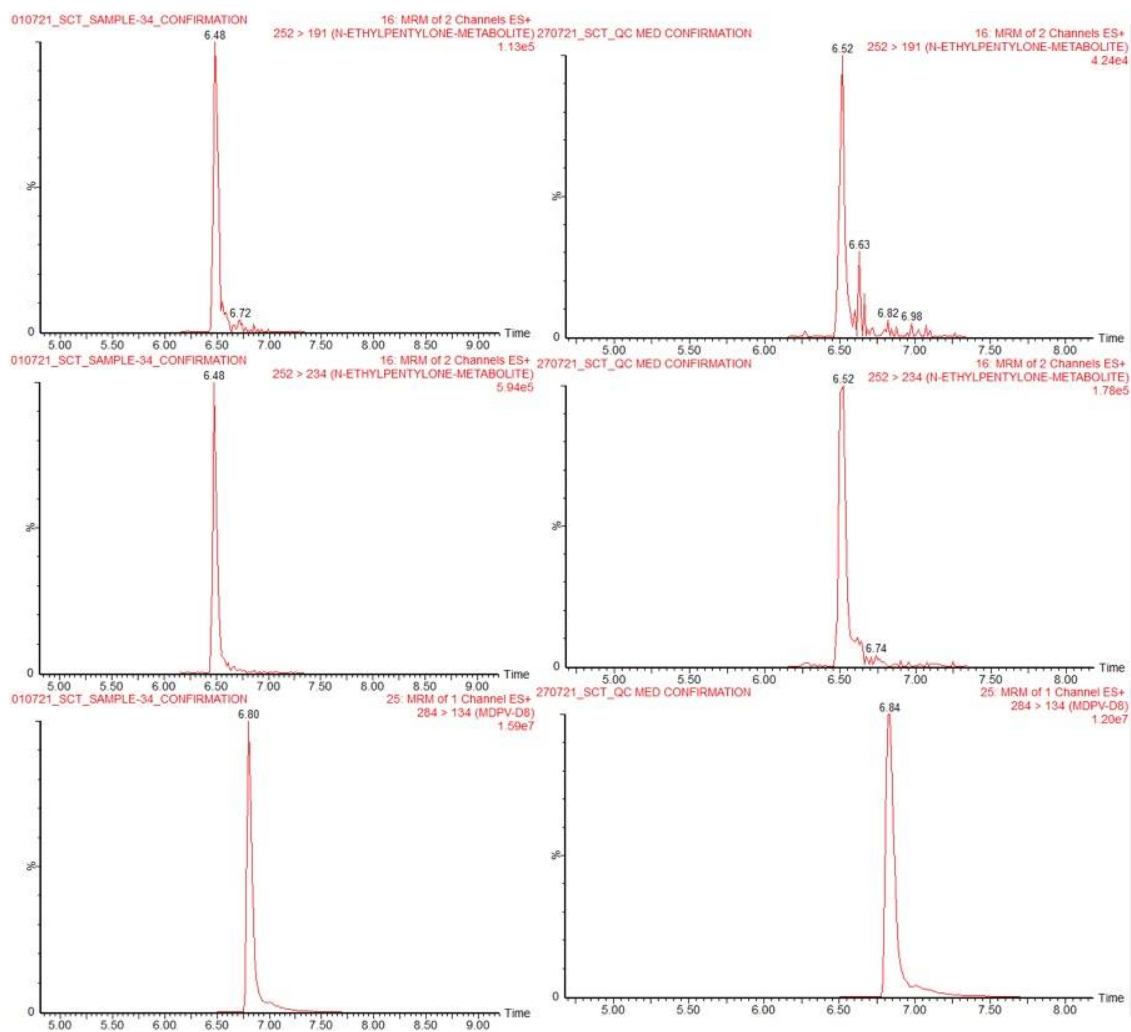

**Figure S3.** Confirmatory results for an authentic urine sample (No. 34) testing positive for dihydro-*N*-ethylpentylone (left); and a QC sample (400 ng/mL; right).

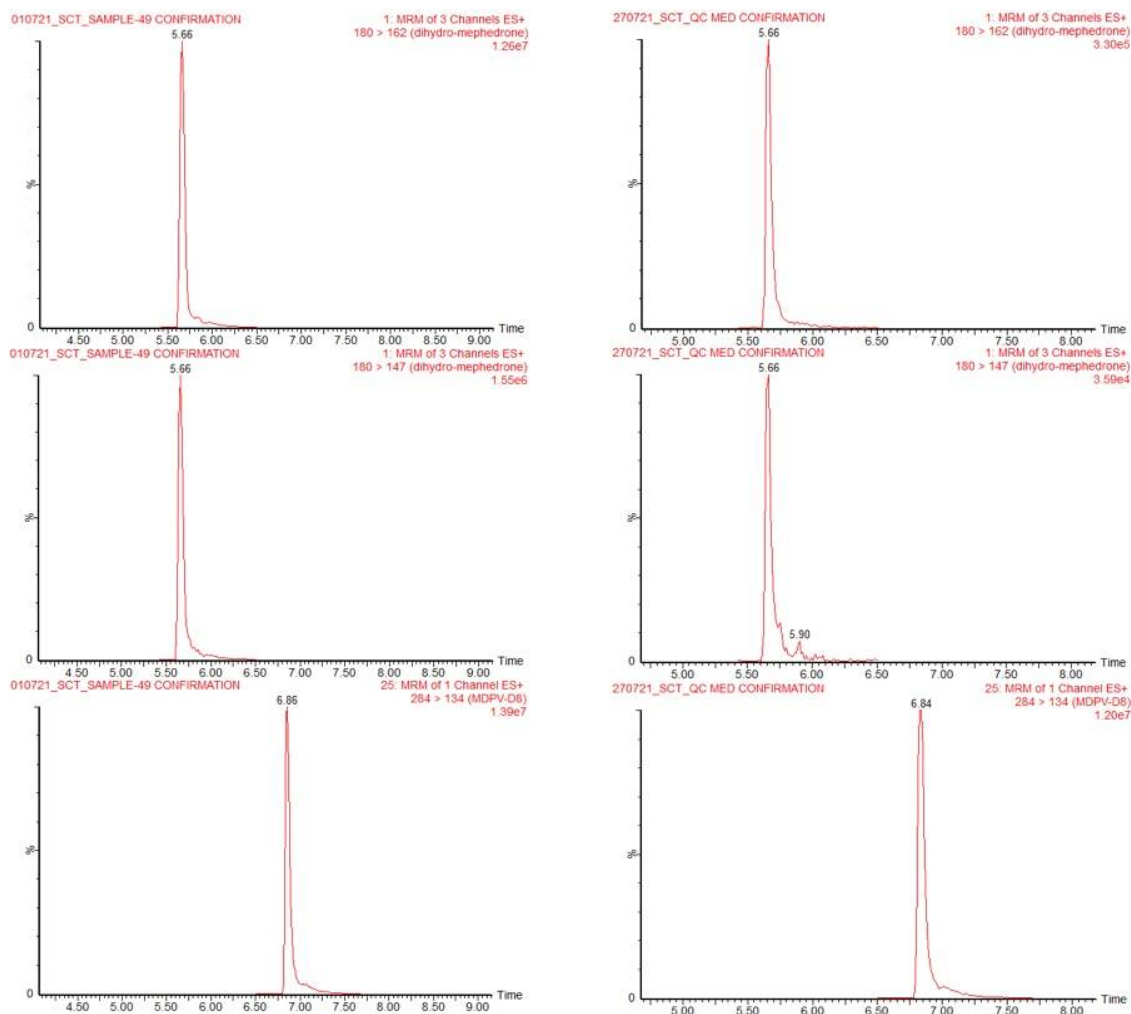

**Figure S4.** Confirmatory results for an authentic urine sample (No. 49) testing positive for dihydro-mephedrone (left); and a QC sample (400 ng/mL; right).

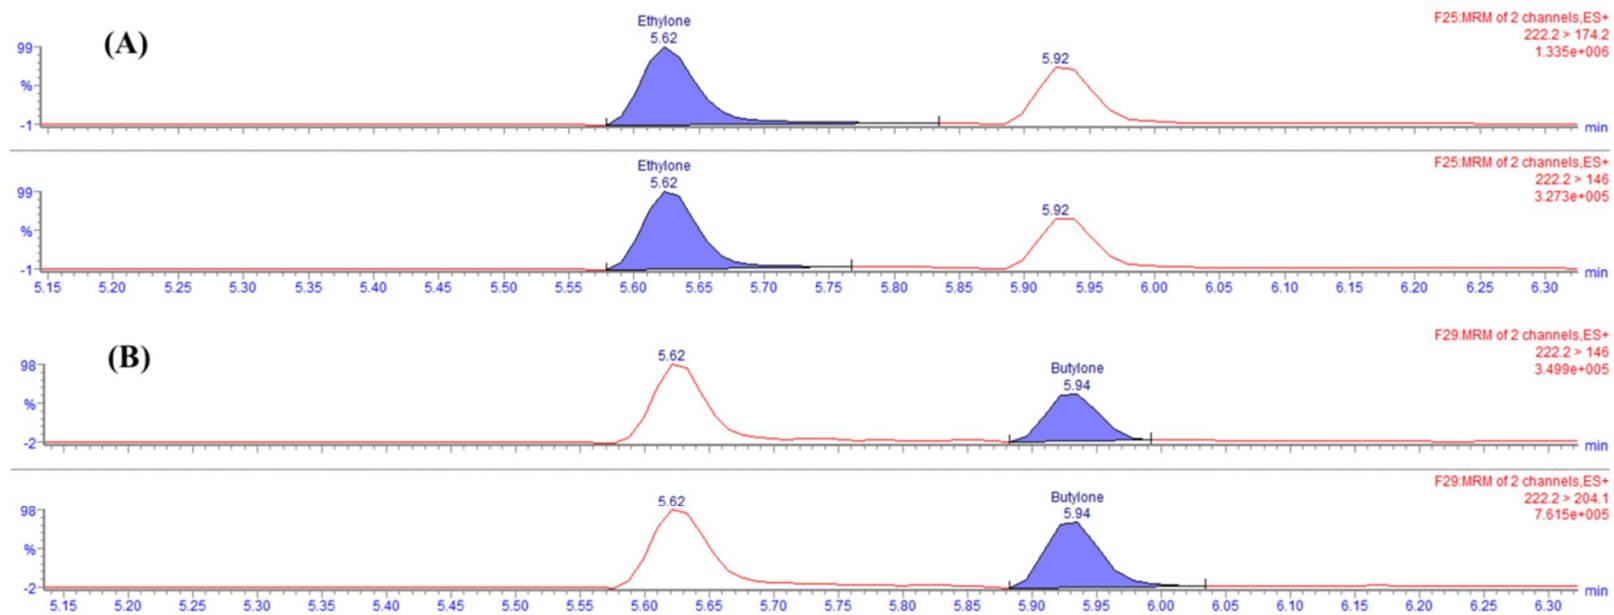

**Figure S5.** Representative MRM chromatograms of ethylone (A) and butylone (B).



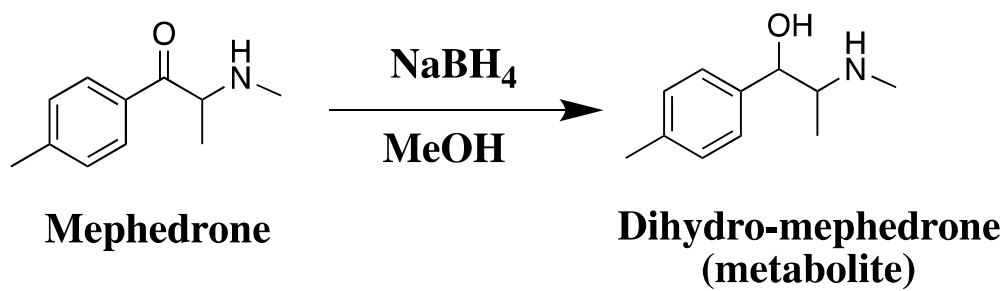

**Figure S6.** Reduction of mephedrone to dihydro-mephedrone.
